# Supplementary material for: A Novel Machine Learning Model for Predicting Orthodontic Treatment Duration
Source: Preprints.org preprint supplement (doi:10.20944/preprints202306.2096.v1), 2023-06-29
Supplement: Supplementary file 1 [file supplementary]

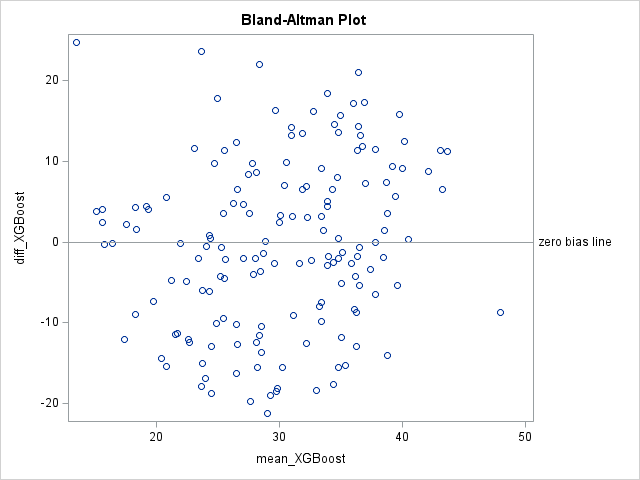

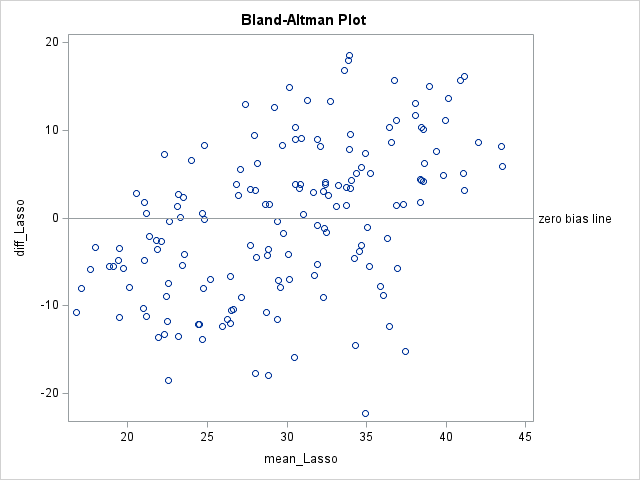

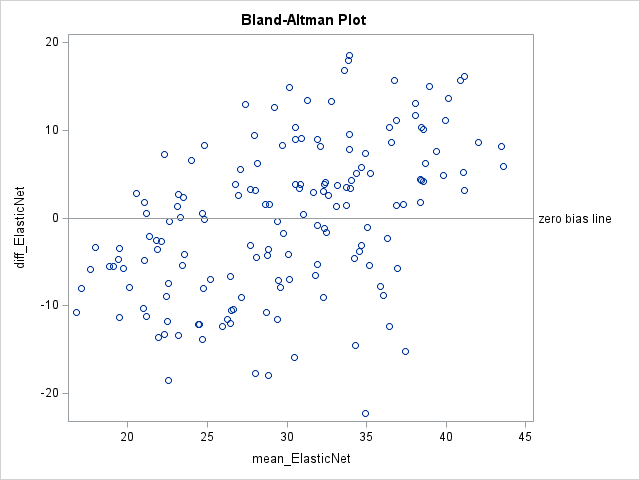

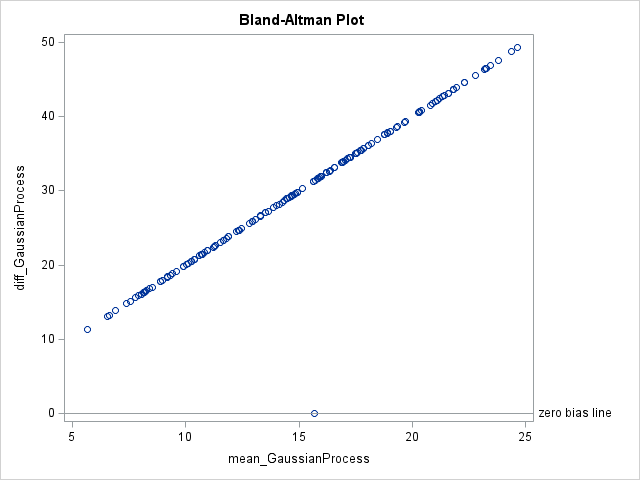

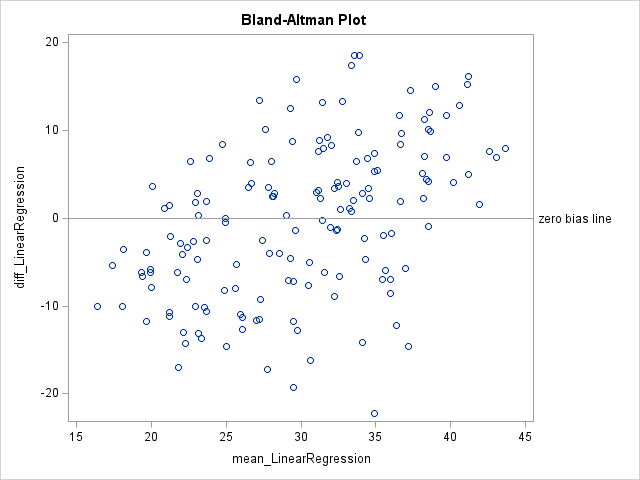

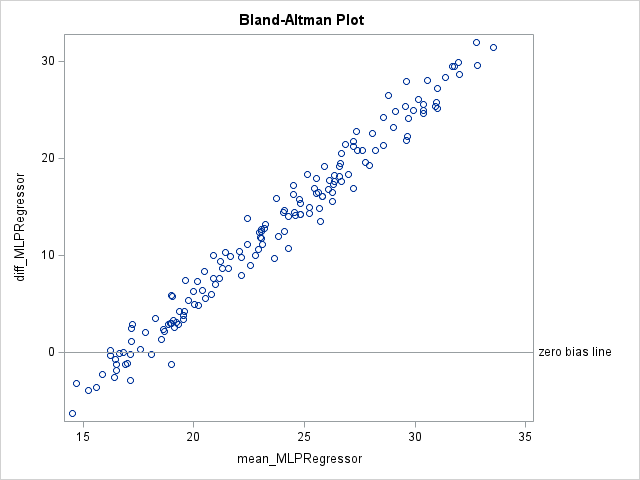

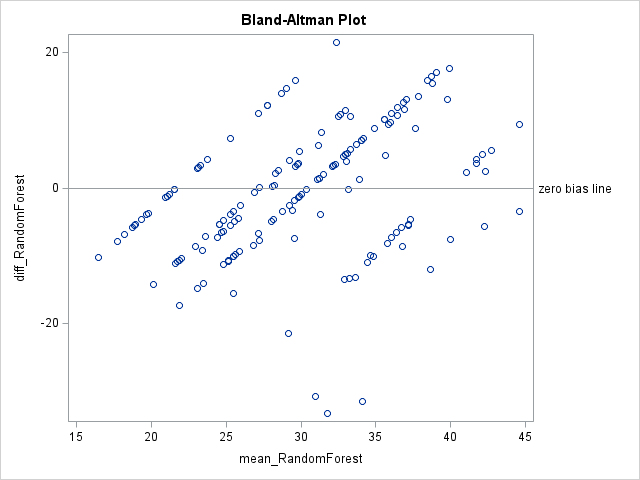

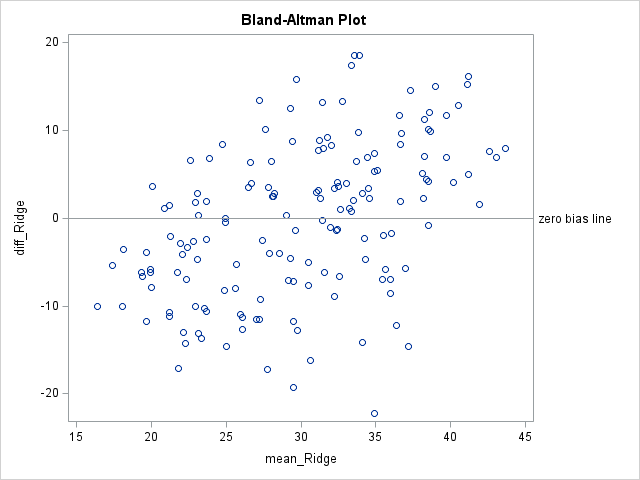

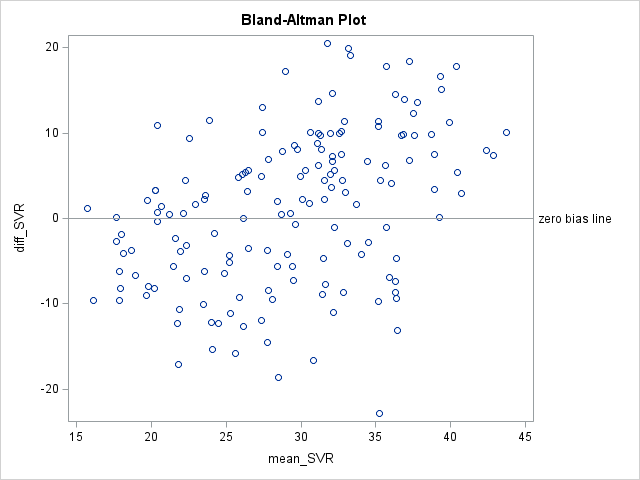


**Supplementary Figure 1.** Bland-Altman plots showing the agreement between actual and predicted treatment durations using raw data.


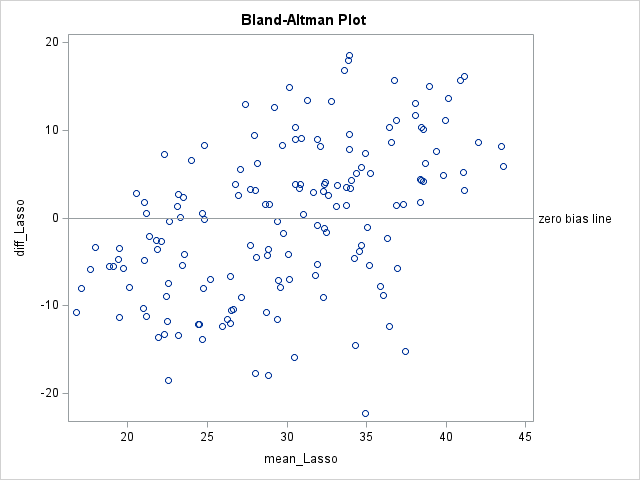

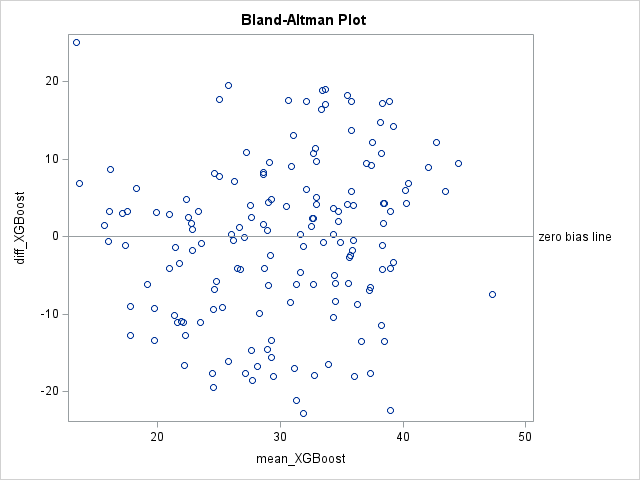

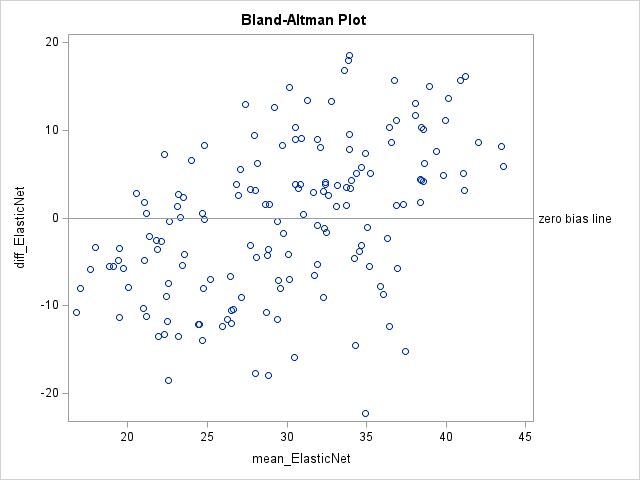

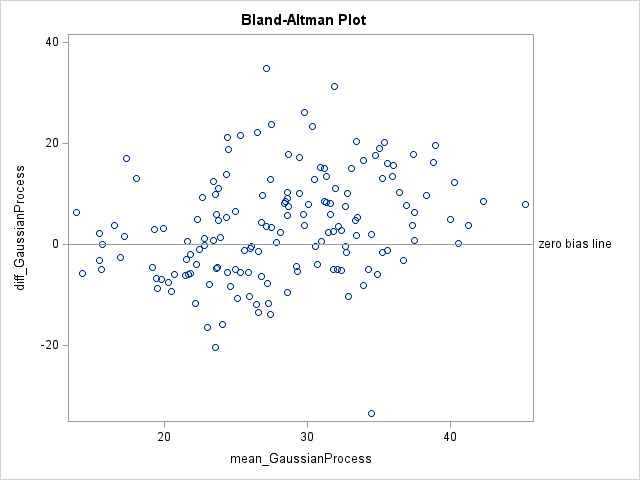

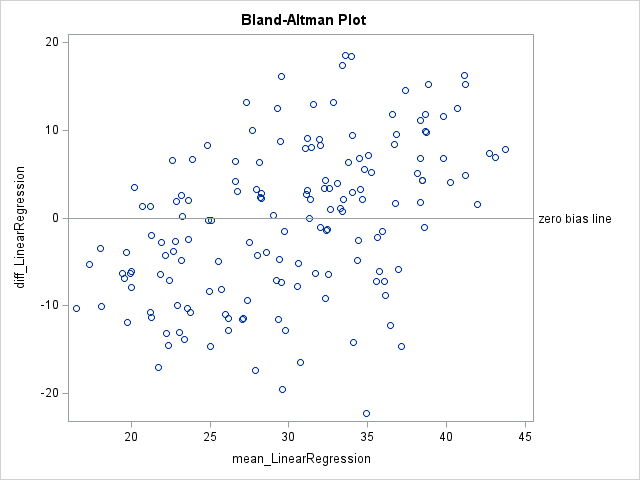

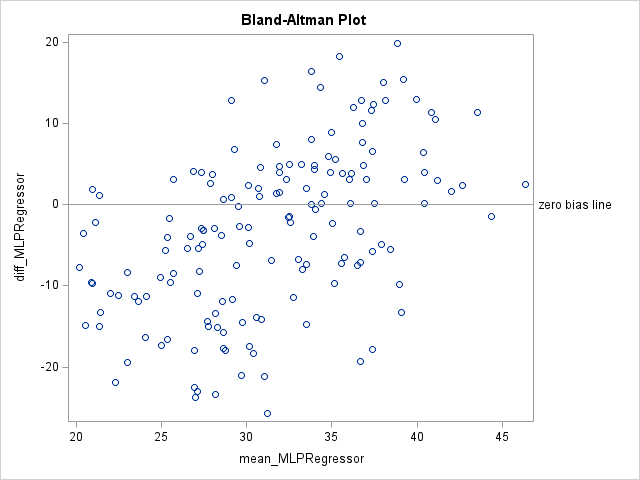

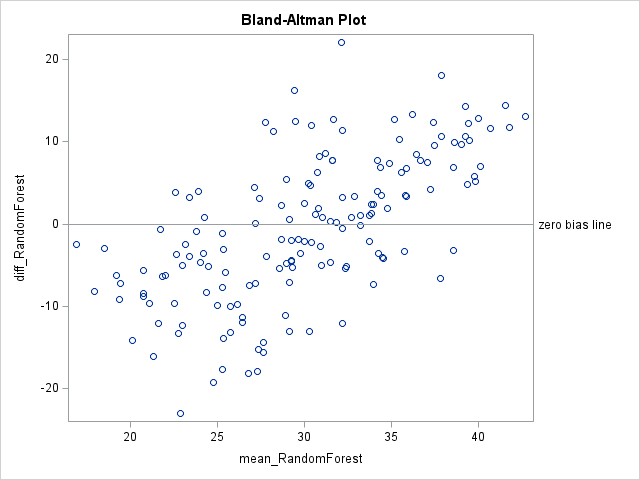

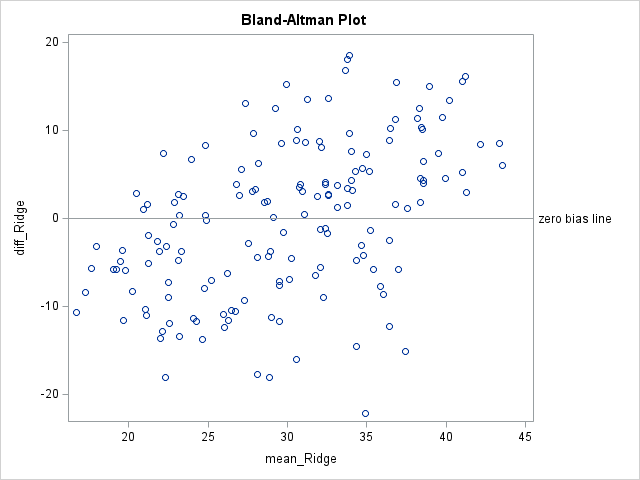

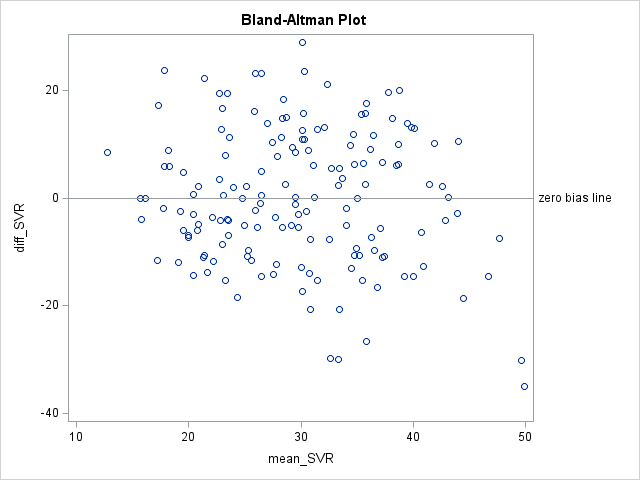


**Supplementary Figure 2.** Bland-Altman plots showing the agreement between actual and predicted treatment durations using normalized data.
